# Supplementary material for: Synthesis and characterization of RhIII corroles: unusual reactivity patterns observed during metalation reactions
Source: Royal Society of Chemistry journal article supplement (doi:10.1039/b500247h), 2005-01-01

### Supplementary materials

#### Synthesis and Characterization of Rh<sup>III</sup> Corroles: Unusual Reactivity Patterns Observed During Metallation reactions

James P. Collman,\* Hong J. H. Wang, Richard A. Decreau, Todd Eberspacher,  
Christopher J. Sunderland  
Department of Chemistry, Stanford University, Stanford, CA 94305

**Synthesis.** Rh<sup>III</sup>(COR)(NEt<sub>2</sub>)<sub>2</sub> **1-3** and Rh<sup>III</sup>(COR)(unhindered base)<sub>2</sub>. Free base corrole (0.015 mmol) and [Rh(COD)Cl]<sub>2</sub> (0.023 mmol) were mixed in dichloromethane(10 ml) followed by addition of the base (0.075 mmol). The mixture was stirred at room temperature until TLC showed complete consumption of the starting corrole. The solvent was then evaporated under reduced pressure. The residue was passed through a column of silica eluting with dichloromethane/hexanes (1:3). The first fraction was collected in 70-90% yield .

**Rh<sup>III</sup>(TPFC)(NEt<sub>2</sub>)<sub>2</sub> 1.** <sup>1</sup>H NMR (C<sub>6</sub>D<sub>6</sub>, 400 MHz,  $\delta$  in ppm): 9.15 (d,  $J$  = 4.4 Hz, 2H), 8.72 (d,  $J$  = 4.8 Hz, 2H), 8.57 (d,  $J$  = 4.4 Hz, 2H), 8.49 (d,  $J$  = 4.4 Hz, 2H), -2.273 (t,  $J$  = 7.2, 12H), -3.22 (m, 4H) -3.41 (m, 4H), -6.06 (b, 2H). UV-vis (CH<sub>2</sub>Cl<sub>2</sub>),  $\lambda_{\max}$  (nm): 446, 412, 590, 658. MS (EI<sup>+</sup>)  $m/z$  550.9 (M<sup>+</sup>, 100%), 970.1 (15), 1042.2 (18).

**Rh<sup>III</sup>(TMFC)(NEt<sub>2</sub>)<sub>2</sub> 2.** <sup>1</sup>H NMR (C<sub>6</sub>D<sub>6</sub>, 400 MHz,  $\delta$  in ppm): 9.20 (d,  $J$  = 4.0 Hz, 2H), 9.01 (d,  $J$  = 4.8 Hz, 2H), 8.81 (d,  $J$  = 4.8 Hz, 2H), 8.79 (d,  $J$  = 4.4 Hz, 2H), 8.24 (dd,  $J$  = 8.4, 5.6 Hz, 4H), 8.16 (dd,  $J$  = 8.8, 5.4 Hz, 2H), 7.26 (overlapping dd's, 6H), -2.27 (t,  $J$  = 7.2, 12H), -3.22 (m, 4H) -3.23 (m, 4H), -5.82 (b, 2H). UV-vis (CH<sub>2</sub>Cl<sub>2</sub>),  $\lambda_{\max}$  (nm) ( $\epsilon \times 10^{-4}$ , mol<sup>-1</sup> L cm<sup>-1</sup>): 414 (2.3), 442 (3.3), 586 (1.0), 610 (2.0). MS (EI<sup>+</sup>)  $m/z$  680.2 (M<sup>+</sup>, 100%), 753.4 (20), 828.4 (18).

# Supplementary Material (ESI) for Chemical Communications  
# This journal is © The Royal Society of Chemistry 2005

**Rh<sup>III</sup>(BTFC)(NEt<sub>2</sub>)<sub>2</sub> 3.** <sup>1</sup>H NMR (C<sub>6</sub>D<sub>6</sub>, 400 MHz,  $\delta$  in ppm): 9.15 (d,  $J$  = 4.4 Hz, 2H), 8.96 (b, 4H), 8.80 (b, 2H), 8.79 (d,  $J$  = 4.8 Hz, 2H), 8.66 (d,  $J$  = 4.4 Hz, 2H), 8.58 (d,  $J$  = 4.8 Hz, 2H), 8.22 (b, 1H), 8.20 (b, 2H), -2.46 (t,  $J$  = 7.2 Hz, 12H), -3.43 (m, 4H) -3.56 (m, 4H), -6.09 (b, 2H). UV-vis (CH<sub>2</sub>Cl<sub>2</sub>),  $\lambda_{\max}$  (nm) ( $\epsilon \times 10^{-4}$ , mol<sup>-1</sup> L cm<sup>-1</sup>): 434 (11), 570 (2.9). MS (EI<sup>+</sup>)  $m/z$  1107.0 (M<sup>+</sup>, 100%), 1180.1 (60), 1213.1 (75).

**Rh<sup>III</sup>(TPFC)Py<sub>2</sub>.** <sup>1</sup>H NMR (C<sub>6</sub>D<sub>6</sub>, 400 MHz,  $\delta$  in ppm): 9.10 (d,  $J$  = 4.4 Hz, 2H), 8.84 (d,  $J$  = 4.8 Hz, 2H), 8.61 (d,  $J$  = 4.4 Hz, 2H), 8.57 (d,  $J$  = 4.4 Hz, 2H), 4.70 (tt,  $J$  = 7.2, 1.6 Hz, 2H), 4.15 (m, 4H), 1.52 (m, 4H). UV-vis (CH<sub>2</sub>Cl<sub>2</sub>),  $\lambda_{\max}$  (nm) ( $\epsilon \times 10^{-4}$ , mol<sup>-1</sup> L cm<sup>-1</sup>): 410 (6.2), 442 (8.4), 552 (1.6), 592 (5.8).

**Rh<sup>III</sup>(TMFC)Py<sub>2</sub>.** <sup>1</sup>H NMR (C<sub>6</sub>D<sub>6</sub>, 400 MHz,  $\delta$  in ppm): 9.24 (d,  $J$  = 4.0 Hz, 2H), 9.12 (d,  $J$  = 4.8 Hz, 2H), 8.89 (d,  $J$  = 4.8 Hz, 2H), 8.88 (d,  $J$  = 4.0 Hz, 2H), 8.27 (dd,  $J$  = 8.8, 5.6 Hz, 4H), 8.11 (dd,  $J$  = 8.8, 5.8 Hz, 2H), 7.24 (overlapping dd's, 6H). UV-vis (CH<sub>2</sub>Cl<sub>2</sub>),  $\lambda_{\max}$  (nm) ( $\epsilon \times 10^{-4}$ , mol<sup>-1</sup> L cm<sup>-1</sup>): 414 (2.3), 444 (3.3), 460 (2.6), 586 (1.0), 612 (2.0).

**Rh<sup>III</sup>(BTFC)Py<sub>2</sub>.** <sup>1</sup>H NMR (C<sub>6</sub>D<sub>6</sub>, 400 MHz,  $\delta$  in ppm): 9.19 (d,  $J$  = 4.0 Hz, 2H), 8.92 (b, 4H), 8.86 (d,  $J$  = 5.2 Hz, 2H), 8.81 (b, 2H), 8.73 (d,  $J$  = 4.0 Hz, 2H), 8.63 (d,  $J$  = 5.2 Hz, 2H), 8.16 (b, 1H), 8.14 (b, 2H), 4.64 (tt,  $J$  = 7.6, 1.2 Hz, 2H), 3.96 (m, 4H), 1.39 (m, 4H). UV-vis (CH<sub>2</sub>Cl<sub>2</sub>),  $\lambda_{\max}$  (nm) ( $\epsilon \times 10^{-4}$ , mol<sup>-1</sup> L cm<sup>-1</sup>): 452 (11), 564 (1.3), 610 (5.6). **Rh<sup>III</sup>(TPFC)(CH<sub>3</sub>-Py)<sub>2</sub> 4-6.** Free base TPFC (0.045 mmol) and [Rh(COD)Cl]<sub>2</sub> (0.068 mmol) were mixed in MeOH (30 ml) followed by addition of 2,6-lutidine (0.45 mmol). The mixture was stirred at room temperature until TLC showed complete consumption of starting corrole. The solvent was evaporated under reduced pressure. The residue was passed through a column of silica eluting with dichloromethane/hexanes

# Supplementary Material (ESI) for Chemical Communications  
# This journal is © The Royal Society of Chemistry 2005

(1:3). The red fractions were collected as a mixture (65-80% yield). The mixture of three compounds was separated on Alumina plates with 1:9 dichloromethane/hexane as elutes.

Fraction 1, **Rh<sup>III</sup>(TPFC)(4-CH<sub>3</sub>-Py)<sub>2</sub> 4**, <sup>1</sup>H NMR (C<sub>6</sub>D<sub>6</sub>, 400 MHz,  $\delta$  in ppm): 9.12 (d,  $J$  = 4.4 Hz, 2H), 8.89 (d,  $J$  = 4.8 Hz, 2H), 8.66 (d,  $J$  = 4.8 Hz, 2H), 8.60 (d,  $J$  = 4.4 Hz, 2H), 4.00 (d,  $J$  = 7.0 Hz, 4H), 1.42 (d,  $J$  = 7.0 Hz, 4H), 0.14 (s, 6H). MS (EI<sup>+</sup>)  $m/z$  1083.0 (M<sup>+</sup>, 100%), 1088.9 (45), 1115.0 (40). Fraction 2, **Rh<sup>III</sup>(TPFC)(3-CH<sub>3</sub>-Py) (4-CH<sub>3</sub>-Py) 5**, <sup>1</sup>H NMR (C<sub>6</sub>D<sub>6</sub>, 400 MHz,  $\delta$  in ppm): 9.10 (d,  $J$  = 4.0 Hz, 2H), 8.89 (d,  $J$  = 4.8 Hz, 2H), 8.64 (d,  $J$  = 4.8 Hz, 2H), 8.59 (d,  $J$  = 4.4 Hz, 2H), 4.63 (d,  $J$  = 7.6 Hz, 1H), 4.21 (dd,  $J$  = 7.6, 6.0 Hz, 1H), 4.00 (d,  $J$  = 6.8 Hz, 2H), 1.53 (d,  $J$  = 6.0 Hz, 1H), 1.43 (s, 1H), 1.38 (d,  $J$  = 6.4 Hz, 2H), 0.25 (s, 3H), 0.14 (s, 3H). MS (EI<sup>+</sup>)  $m/z$  896.3 (M<sup>+</sup>, 100%), 1081.8 (55), 1082.8 (30). Fraction 3, **Rh<sup>III</sup>(TPFC)(3-CH<sub>3</sub>-Py)<sub>2</sub> 6**, <sup>1</sup>H NMR (C<sub>6</sub>D<sub>6</sub>, 400 MHz,  $\delta$  in ppm): 9.08 (d,  $J$  = 4.4 Hz, 2H), 8.89 (d,  $J$  = 4.8 Hz, 2H), 8.64 (d,  $J$  = 4.8 Hz, 2H), 8.60 (d,  $J$  = 4.0 Hz, 2H), 4.61 (d,  $J$  = 7.6 Hz, 2H), 4.20 (dd,  $J$  = 7.6, 6.0 Hz, 2H), 1.50 (d,  $J$  = 5.6 Hz, 2H), 1.40 (s, 2H), 0.24 (s, 3H). MS (EI<sup>+</sup>)  $m/z$  1082.0 (M<sup>+</sup>, 100%), 1090.0 (35), 1151.1 (15).

# Supplementary Material (ESI) for Chemical Communications  
# This journal is © The Royal Society of Chemistry 2005

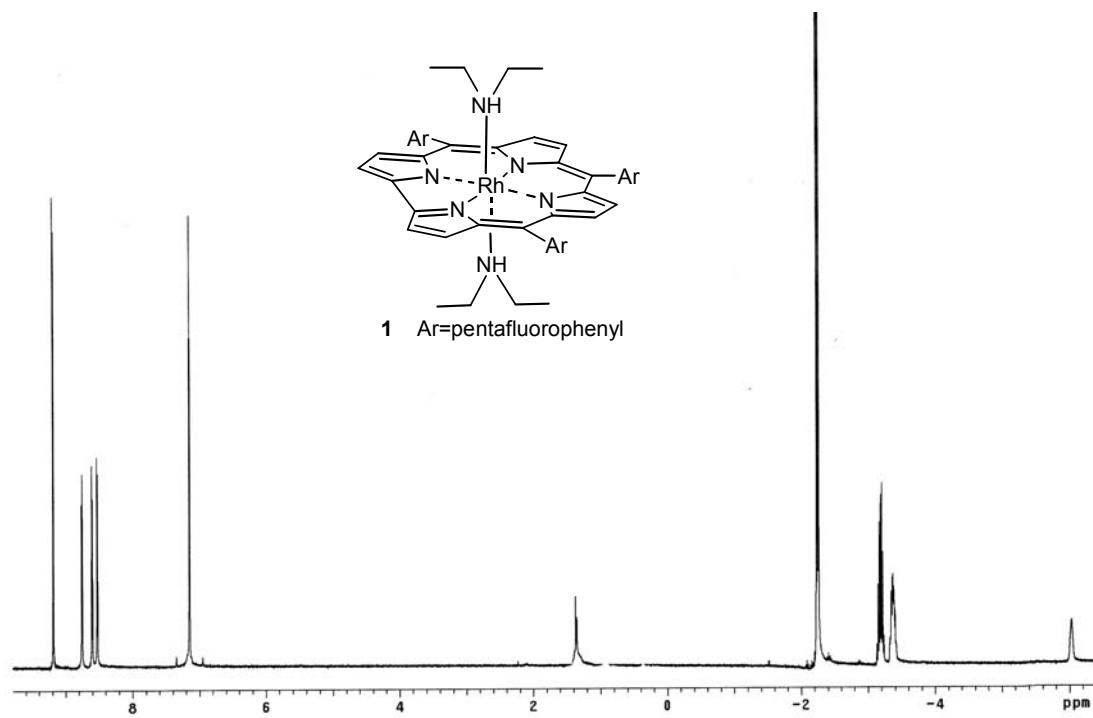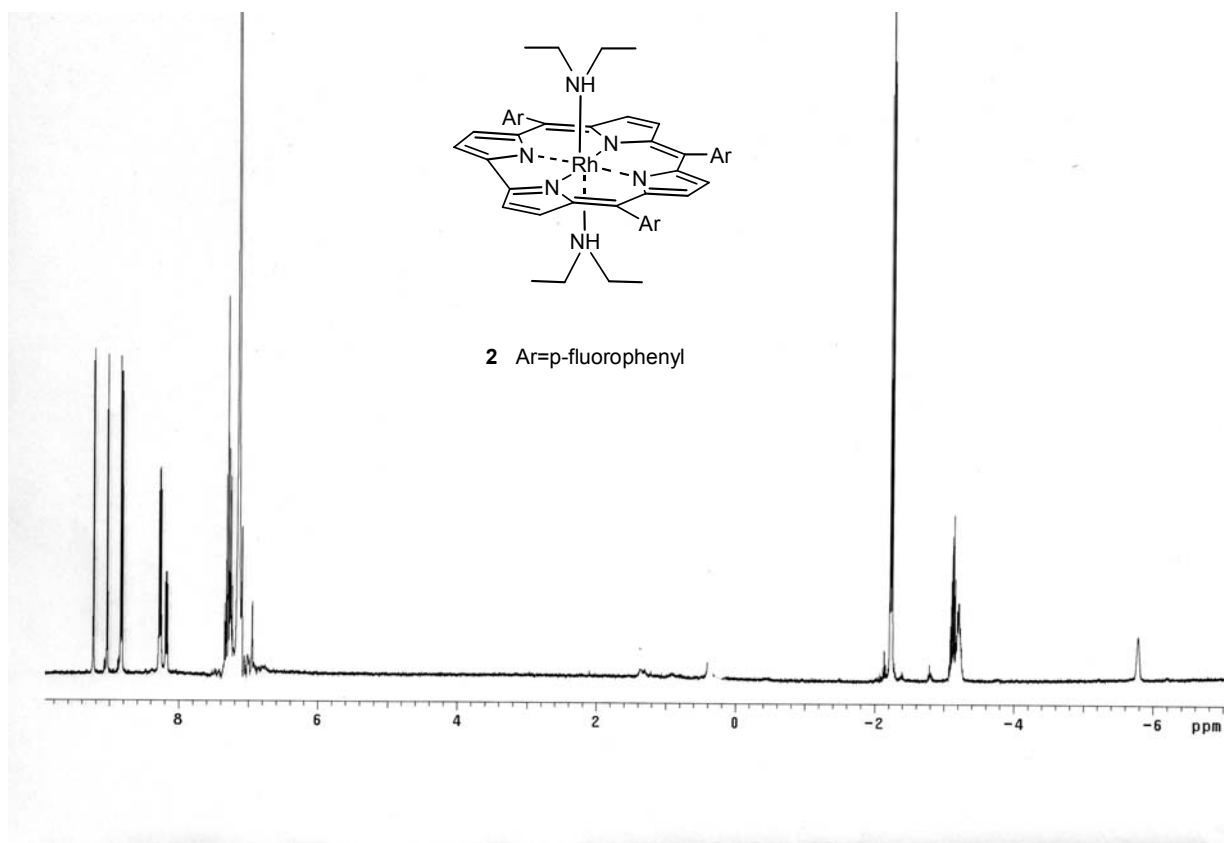

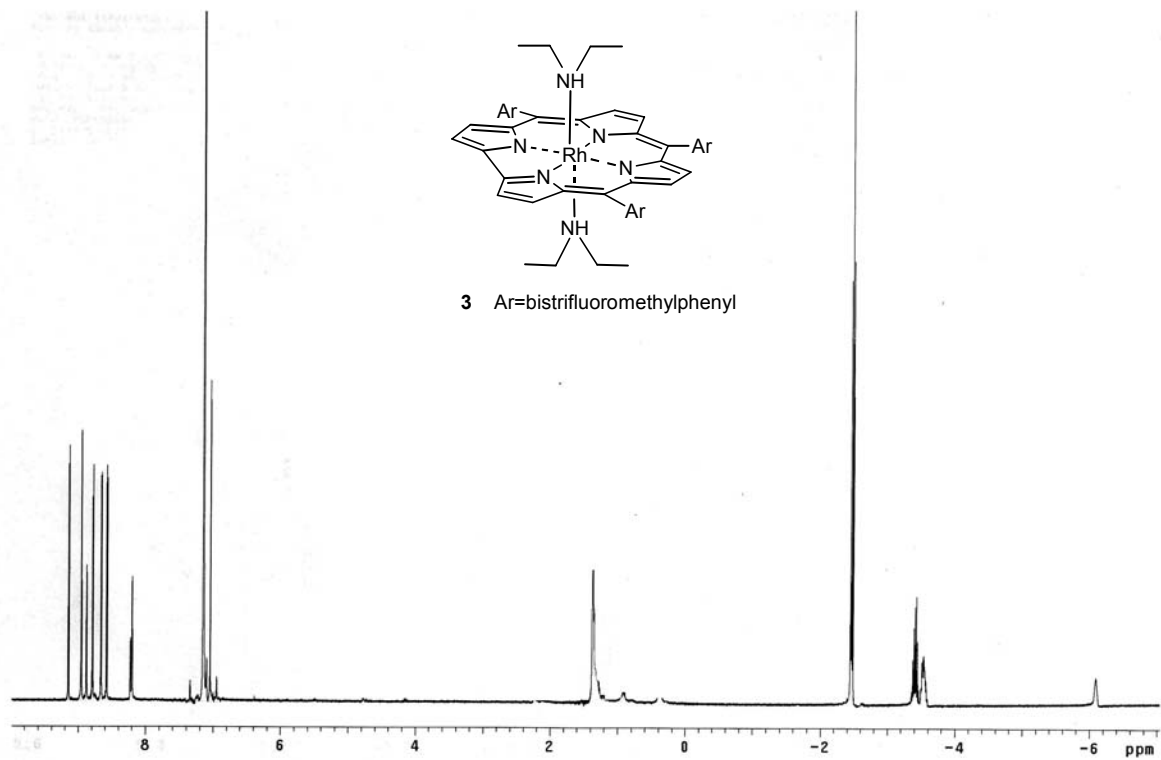

<sup>1</sup>H COSY NMR of compound 1

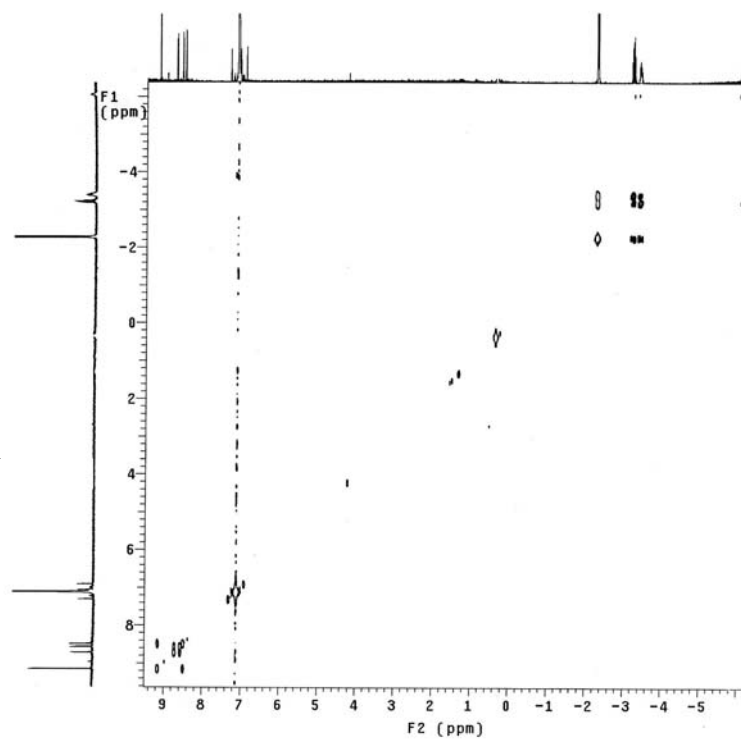

# Supplementary Material (ESI) for Chemical Communications  
# This journal is © The Royal Society of Chemistry 2005

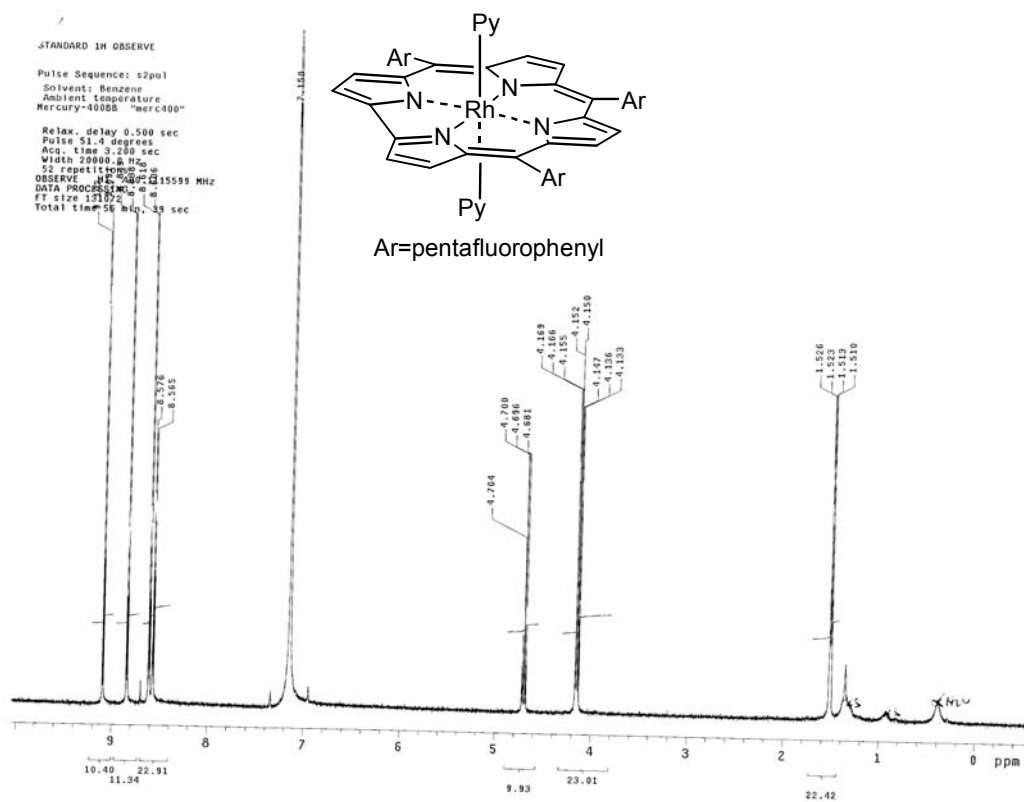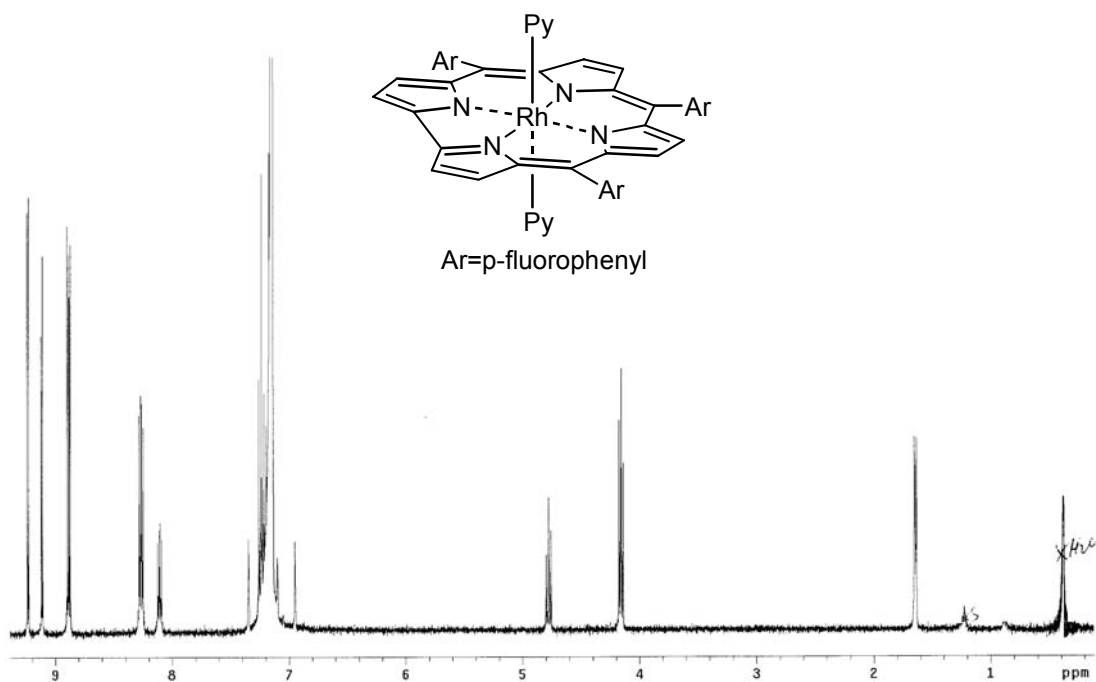

# Supplementary Material (ESI) for Chemical Communications  
# This journal is © The Royal Society of Chemistry 2005

H<sub>2</sub>O

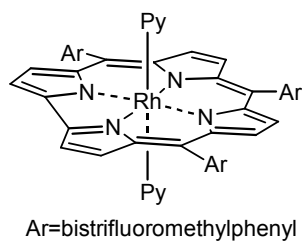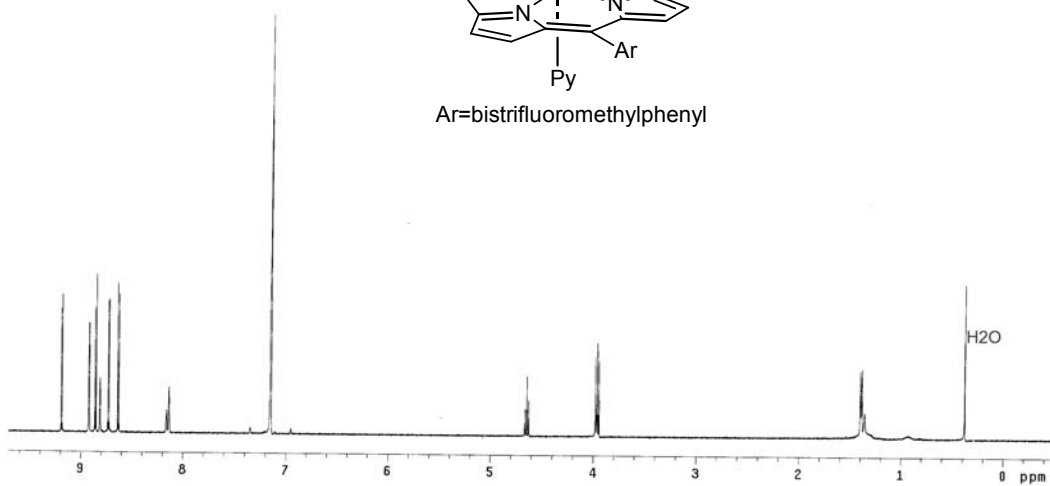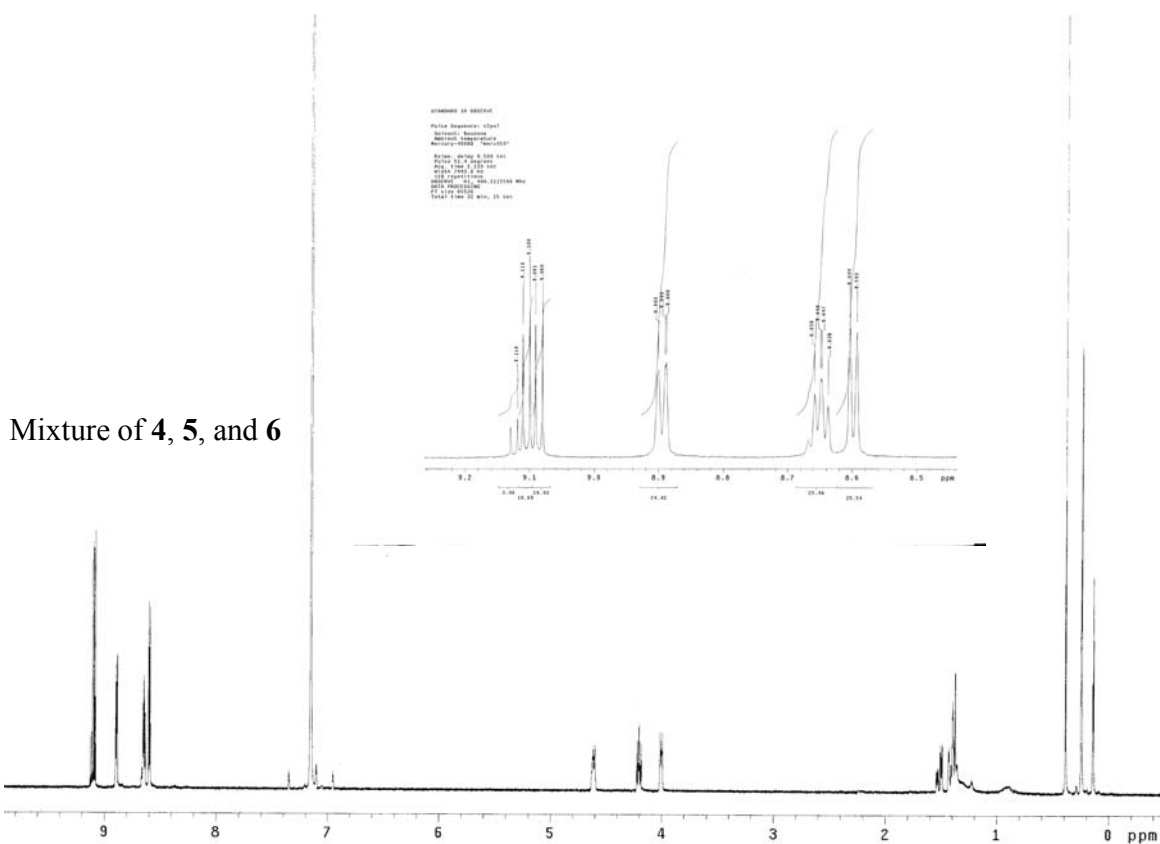

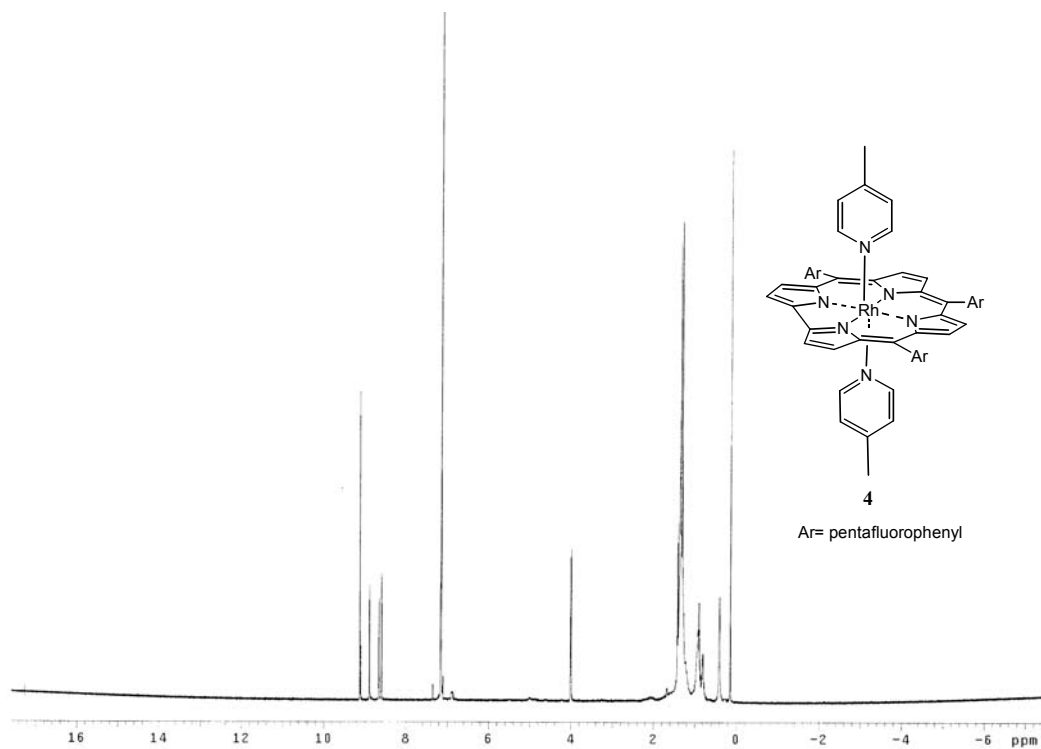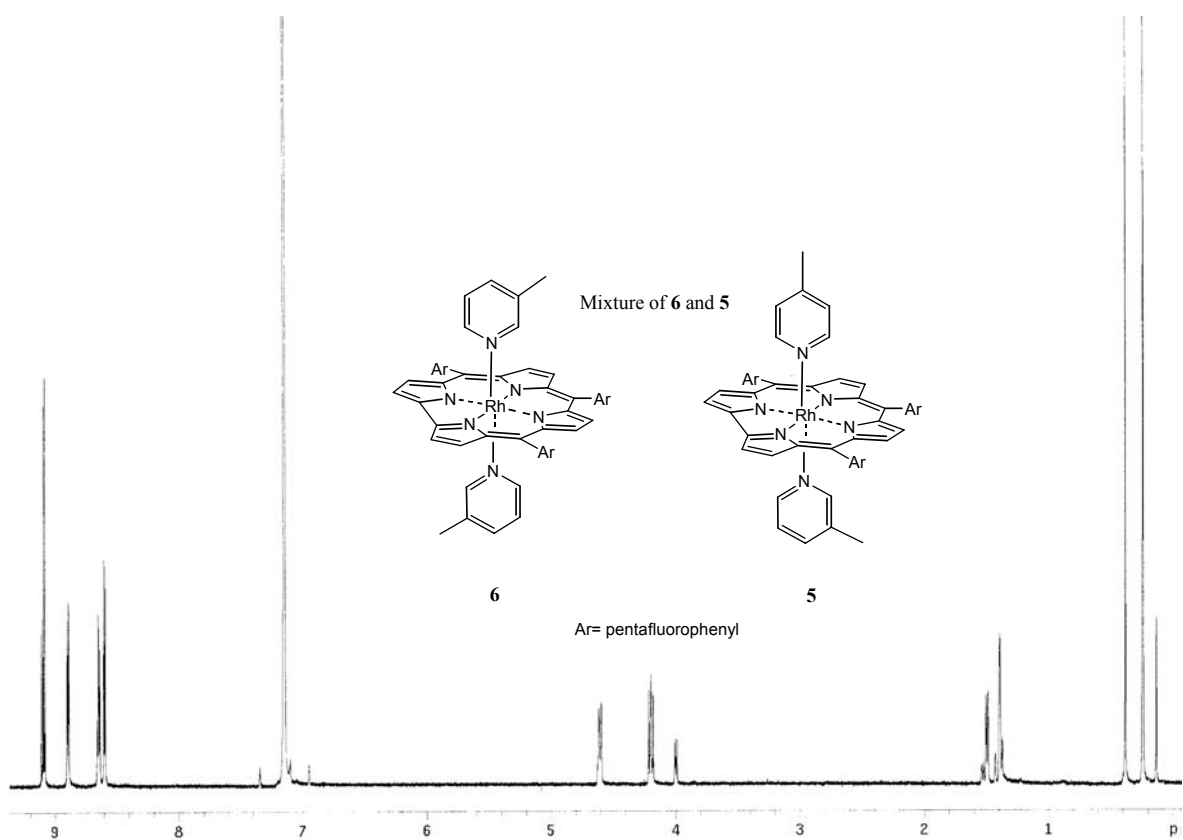



# Supplementary Material (ESI) for Chemical Communications  
# This journal is © The Royal Society of Chemistry 2005

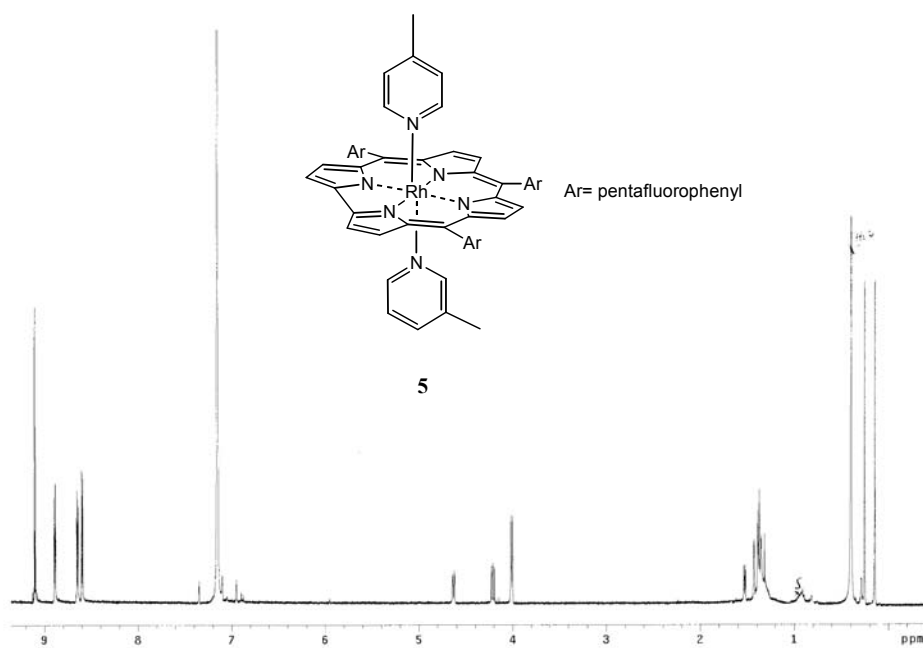

STANDARD IN OBSERVE

Pulse Sequence: gCOSY  
Solvent: Benzene  
Ambient Temperature  
Mercury-400BB "merc100"

Relax. delay 1.500 sec  
Acq. time 0.250 sec  
Width 4096.4 Hz  
2D Width 4096.4 Hz  
2 repetitions

256 increments  
OBSERVE H1, 400.1115598 MHz  
DATA PROCESSING  
Sg. sine bell 0.125 sec  
F1 DATA PROCESSING  
Sg. sine bell 0.021 sec  
FT size 4096 x 4096  
Total time 17 min, 36 sec

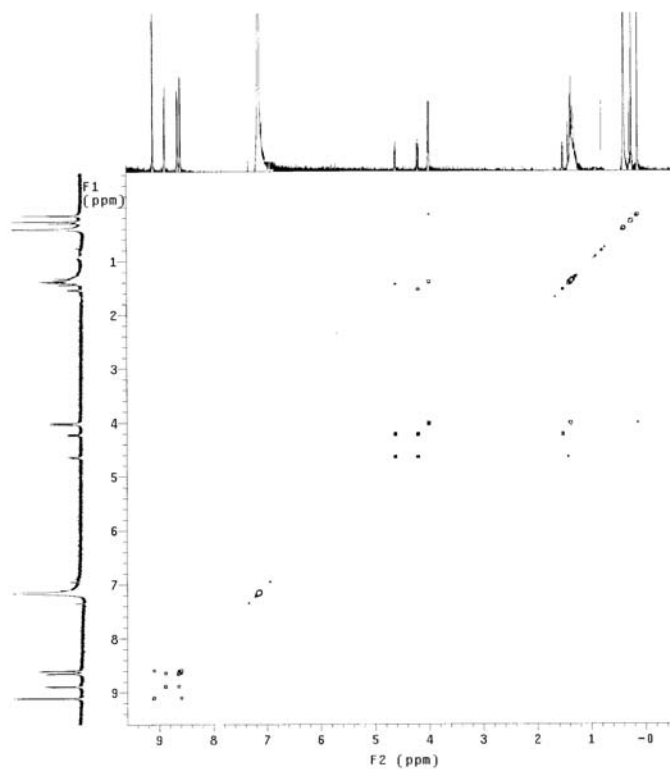

$^1\text{H}$  COSY NMR of **5**

# Supplementary Material (ESI) for Chemical Communications  
# This journal is © The Royal Society of Chemistry 2005

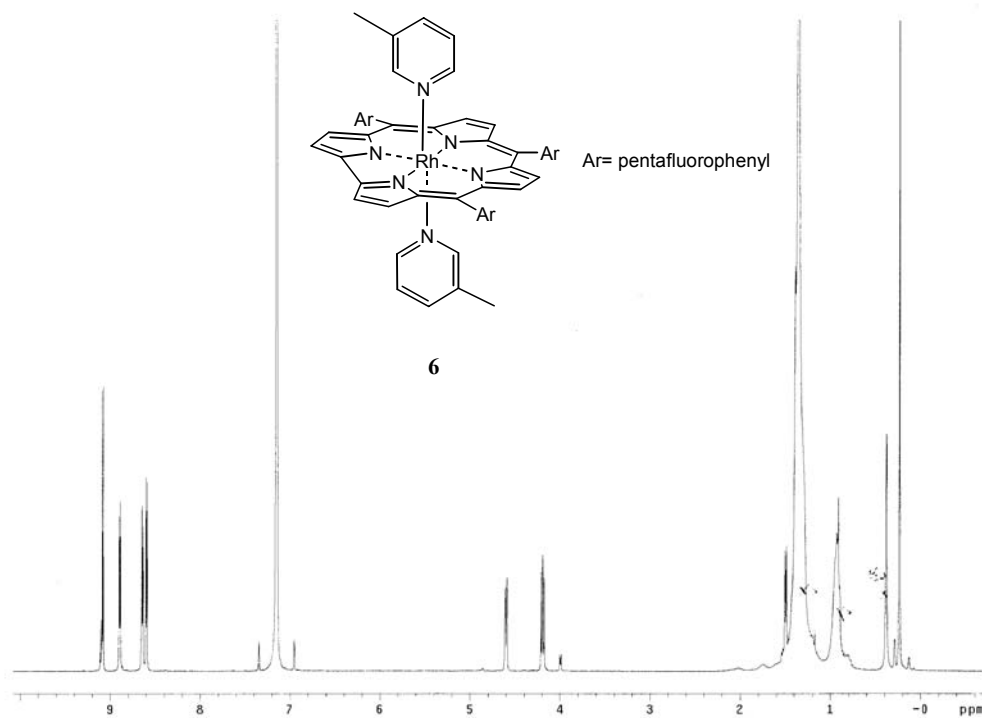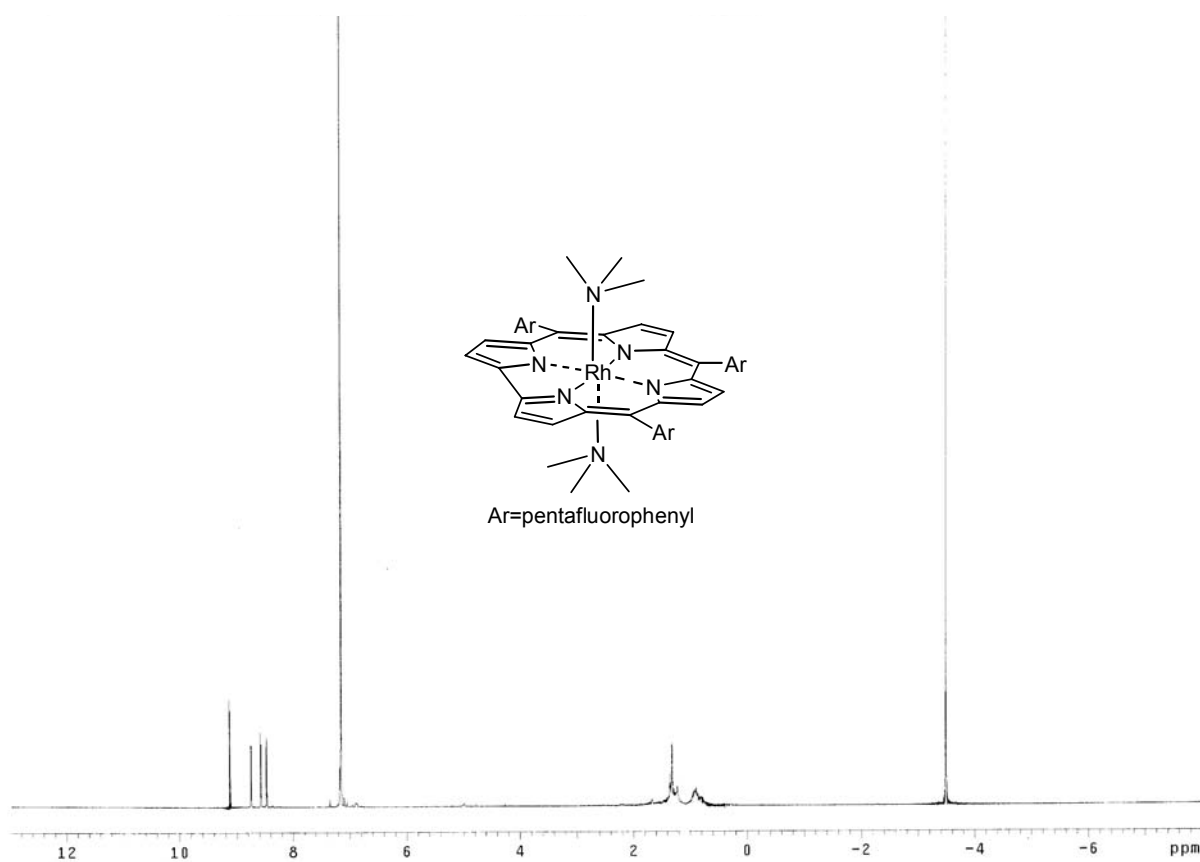

# Supplementary Material (ESI) for Chemical Communications  
# This journal is © The Royal Society of Chemistry 2005

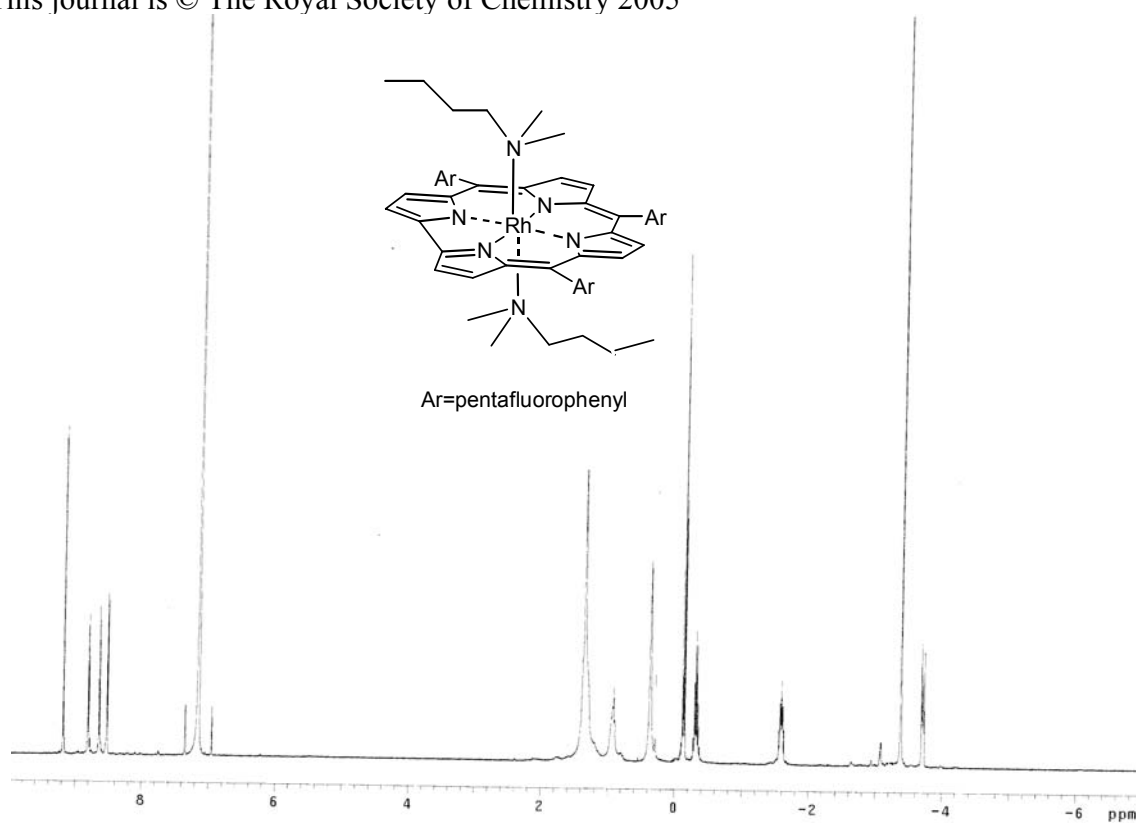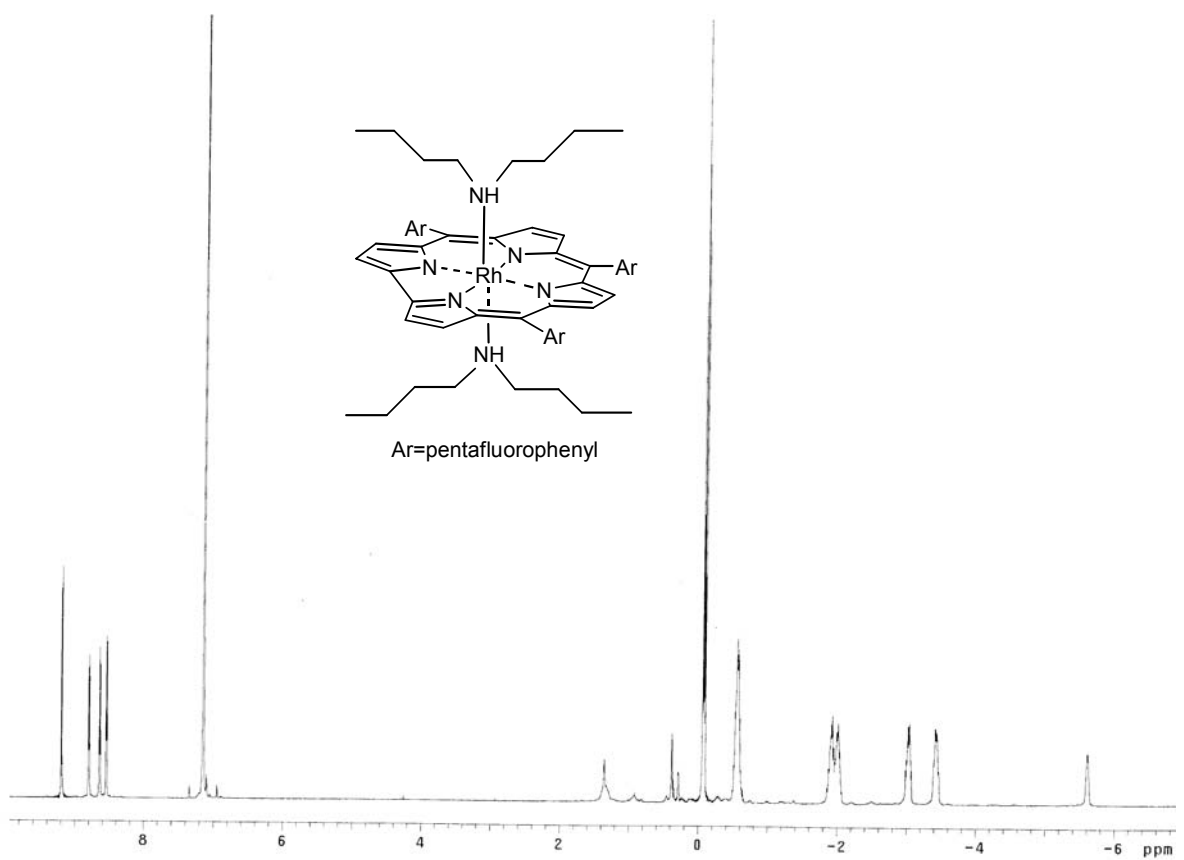

# Supplementary Material (ESI) for Chemical Communications  
# This journal is © The Royal Society of Chemistry 2005

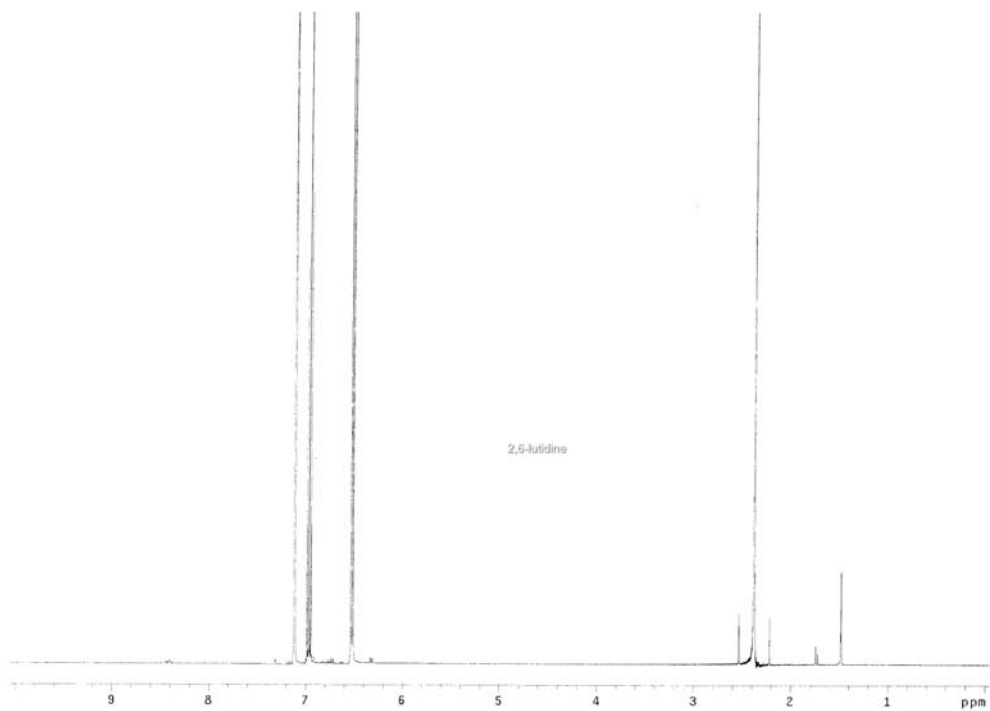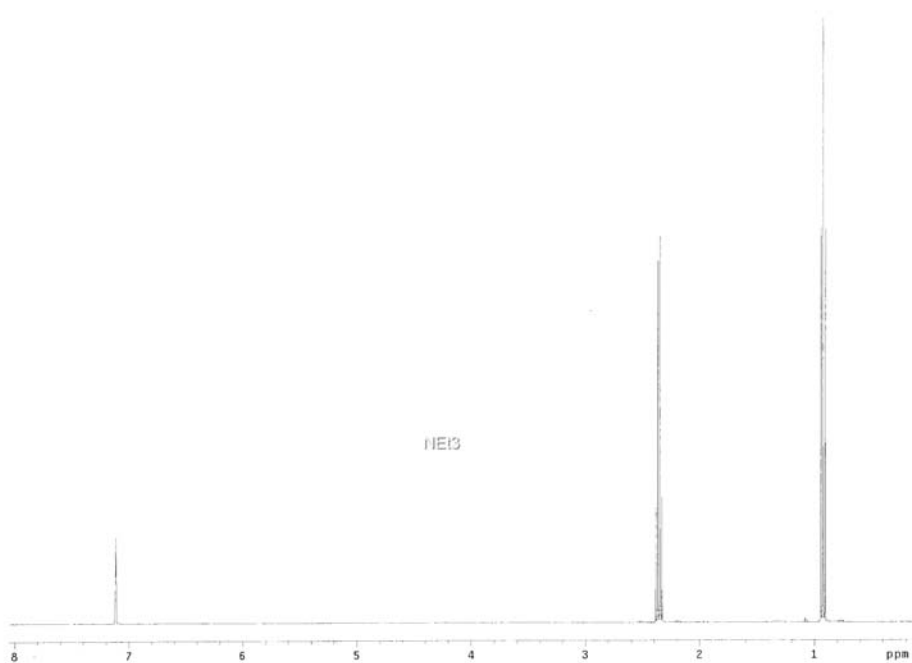

Supplement: b500247h.pdf [file b500247h.pdf]
